# Supplementary material for: Influence of bridging atoms in copper-based coordination polymers for enhancing urease inhibition activity
Source: Royal Society of Chemistry journal article supplement (doi:10.1039/d3nj05051c), 2024-01-01
Supplement: d3nj05051c1.pdf [file d3nj05051c1.pdf]

## Influence of bridging atom in copper-based coordination polymers for enhancing urease inhibition activity

Ling-Li Wang<sup>a, c</sup>, Kai-Tong Wang<sup>b</sup>, Wen-Long Duan<sup>\*b</sup>, Jian Luan<sup>\*b</sup>, Xiao-Ri Han<sup>\*a</sup>

<sup>a</sup> College of land and Environment, Shenyang Agricultural University, Shenyang, 110866, P. R. China

<sup>b</sup> College of Sciences, Shenyang University of Chemical Technology, Shenyang, 110142, P. R. China

<sup>c</sup> Institute of Applied Ecology, Chinese Academy of Sciences, Shenyang, 110016, P. R. China

Emails: [hanxr@syau.edu.cn](mailto:hanxr@syau.edu.cn); [wlduan@syuct.edu.cn](mailto:wlduan@syuct.edu.cn); [2010044@stu.neu.edu.cn](mailto:2010044@stu.neu.edu.cn)

**Table S1** Crystallographic data for **Cu-CP-1** and **Cu-CP-2**.

| Cu-CP                                   | <b>1</b>                                                                         | <b>2</b>                                                                       |
|-----------------------------------------|----------------------------------------------------------------------------------|--------------------------------------------------------------------------------|
| Empirical formula                       | C <sub>49</sub> H <sub>55</sub> ClCu <sub>2</sub> N <sub>8</sub> O <sub>16</sub> | C <sub>30</sub> H <sub>24</sub> Cu <sub>3</sub> N <sub>4</sub> O <sub>12</sub> |
| $F_w$                                   | 1174.54                                                                          | 823.15                                                                         |
| Crystal system                          | Monoclinic                                                                       | Triclinic                                                                      |
| Space group                             | <i>C2/c</i>                                                                      | <i>P-1</i>                                                                     |
| a (Å)                                   | 14.4011(8)                                                                       | 8.3526(10)                                                                     |
| b (Å)                                   | 16.9452(8)                                                                       | 8.6543(10)                                                                     |
| c (Å)                                   | 22.2478(12)                                                                      | 10.7547(13)                                                                    |
| $\alpha$ (°)                            | 90                                                                               | 85.213(2)                                                                      |
| $\beta$ (°)                             | 101.857(2)                                                                       | 75.719(2)                                                                      |
| $\gamma$ (°)                            | 90                                                                               | 80.446(2)                                                                      |
| $V$ (Å <sup>3</sup> ), Z, T (K)         | 5313.3(5), 4, 296(2)                                                             | 742.20(15), 1, 296(2)                                                          |
| $D_c/g\text{ cm}^{-3}$ , F(000)         | 1.468, 2432                                                                      | 1.842, 415                                                                     |
| Goodness-of-fit on $F^2$                | 1.030                                                                            | 1.019                                                                          |
| Reflections collected                   | 42125                                                                            | 3804                                                                           |
| Unique data, $R_{\text{int}}$           | 6977, 0.0495                                                                     | 2586, 0.0107                                                                   |
| $\theta$ Range (°)                      | 2.23–28.92                                                                       | 1.96–25.00                                                                     |
| $R_1$ ( $I > 2\sigma(I)$ ) <sup>a</sup> | 0.0437                                                                           | 0.0296                                                                         |
| $wR_2^b$ (all data) <sup>a</sup>        | 0.1256                                                                           | 0.0842                                                                         |

$$^a R_1 = \frac{\sum ||F_o| - |F_c||}{\sum |F_o|}, ^b wR_2 = \frac{\sum [w(F_o^2 - F_c^2)^2]}{\sum [w(F_o^2)^2]}^{1/2}.$$

**Table S2** Selected bond distances (Å) and angles (°) for Cu-CP-1.

|                  |            |                  |            |
|------------------|------------|------------------|------------|
| Cu(1)–O(3)       | 1.9646(16) | Cu(1)–O(1)       | 1.9850(17) |
| Cu(1)–N(1)       | 2.025(2)   | Cu(1)–N(2)       | 2.055(2)   |
| Cu(1)–Cl(1)      | 2.5447(7)  | O(3)–Cu(1)–O(1)  | 159.83(8)  |
| O(3)–Cu(1)–N(1)  | 89.05(8)   | O(1)–Cu(1)–N(1)  | 87.76(8)   |
| O(3)–Cu(1)–N(2)  | 90.64(7)   | O(1)–Cu(1)–N(2)  | 90.56(7)   |
| N(1)–Cu(1)–N(2)  | 174.25(8)  | O(3)–Cu(1)–Cl(1) | 111.19(6)  |
| O(1)–Cu(1)–Cl(1) | 88.96(6)   | N(1)–Cu(1)–Cl(1) | 95.81(6)   |
| N(2)–Cu(1)–Cl(1) | 89.65(6)   |                  |            |

**Table S3** Selected bond distances (Å) and angles (°) for Cu-CP-2.

|                     |            |                   |           |
|---------------------|------------|-------------------|-----------|
| Cu(1)–O(6)          | 1.892(2)   | Cu(1)–O(6)#1      | 1.892(2)  |
| Cu(1)–O(1)#1        | 1.940(2)   | Cu(1)–O(1)        | 1.940(2)  |
| N(1)–Cu(2)          | 2.069(2)   | Cu(2)–O(6)        | 1.880(2)  |
| Cu(2)–O(3)#2        | 1.9641(19) | Cu(2)–O(2)        | 1.972(2)  |
| O(6)–Cu(1)–O(6)#1   | 180        | O(6)–Cu(1)–O(1)#1 | 86.95(9)  |
| O(6)#1–Cu(1)–O(1)#1 | 93.05(9)   | O(6)–Cu(1)–O(1)   | 93.05(9)  |
| O(6)#1–Cu(1)–O(1)   | 86.94(9)   | O(1)#1–Cu(1)–O(1) | 180       |
| O(6)–Cu(2)–O(3)#2   | 95.65(9)   | O(6)–Cu(2)–O(2)   | 89.56(8)  |
| O(3)#2–Cu(2)–O(2)   | 161.52(10) | O(6)–Cu(2)–N(1)   | 177.11(9) |
| O(3)#2–Cu(2)–N(1)   | 86.62(8)   | O(2)–Cu(2)–N(1)   | 87.74(9)  |

Symmetry codes: #1  $-x + 1, -y, -z$ ; #2  $-x + 2, -y, -z$ .**Table S4** Hydrogen bonding geometries (Å, °) of Cu-CP-1.

| Cu-CP    | D–H···A                  | D–H  | H···A | D···A  | D–H···A |
|----------|--------------------------|------|-------|--------|---------|
| <b>1</b> | N4–H4A···O2 <sup>i</sup> | 0.86 | 2.10  | 2.8908 | 153     |

Symmetry code: <sup>i</sup>  $1/2 - x, -1/2 + y, 1/2 - z$ .

**Table S5** Comparison of inhibition of urease by the Cu-CPs and other materials.

| Materials                                                                                                      | Percentage inhibition rate<br>(100 $\mu$ M) <sup>a</sup> | IC <sub>50</sub> $\pm$ SEM<br>( $\mu$ M) (3h) <sup>b</sup> | Reference        |
|----------------------------------------------------------------------------------------------------------------|----------------------------------------------------------|------------------------------------------------------------|------------------|
| Cu <sup>2+</sup>                                                                                               | 87.50%                                                   | —                                                          | S1               |
| 3-dpye                                                                                                         | —                                                        | —                                                          | —                |
| HBCA                                                                                                           | —                                                        | —                                                          | —                |
| 1,2-H <sub>2</sub> BDC                                                                                         | —                                                        | —                                                          | —                |
| DMSO                                                                                                           | —                                                        | —                                                          | —                |
| AHA                                                                                                            | 84.30%                                                   | 37.20 $\pm$ 4.00                                           | S2               |
| [2HL] <sup>2+</sup> ·[CuCl <sub>4</sub> ] <sup>2-</sup>                                                        |                                                          |                                                            |                  |
| L = N <sup>1</sup> ,N <sup>1</sup> ,N <sup>2</sup> ,N <sup>2</sup> -tetrakis(2-fluorobenzyl)ethane-1,2-diamine | 96.70%                                                   | 1.87 $\pm$ 0.01                                            | S3               |
| [Cu(Hpz) <sub>4</sub> Cl <sub>2</sub> ]                                                                        | 99.70%                                                   | 0.93 $\pm$ 0.01                                            | S4               |
| Hpz = pyrazole                                                                                                 |                                                          |                                                            |                  |
| tetrakis(m-bromo)-bis(m-4-chloro-2-((2-(piperidin-1-yl)ethyl)carboximidoyl)phenolato)-tri-copper(II)           | —                                                        | 1.00                                                       | S5               |
| Cu(C <sub>19</sub> H <sub>16</sub> NO <sub>2</sub> ) <sub>2</sub>                                              | —                                                        | 1.45                                                       | S6               |
| <b>Cu-CP-1</b>                                                                                                 | 95.08                                                    | 0.83 $\pm$ 0.01                                            | <b>This work</b> |
| <b>Cu-CP-2</b>                                                                                                 | 90.96                                                    | 2.53 $\pm$ 0.01                                            | <b>This work</b> |

<sup>a</sup> The concentration of the tested material is 100  $\mu$ M.

<sup>b</sup> IC<sub>50</sub> values represent mean  $\pm$  SD from three different experiments.

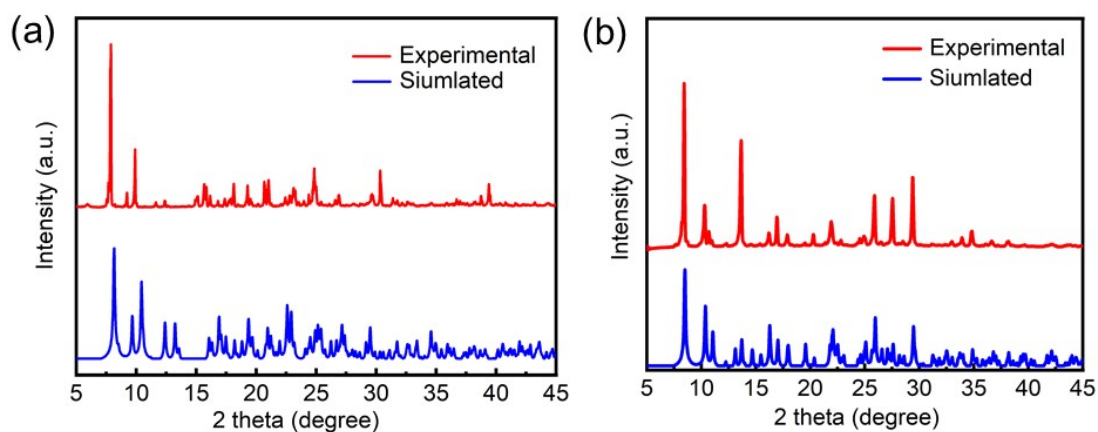

**Fig. S1** Experimental (red) and simulated (blue) PXR D patterns of Cu-CP-1 (a) and Cu-CP-2 (b).

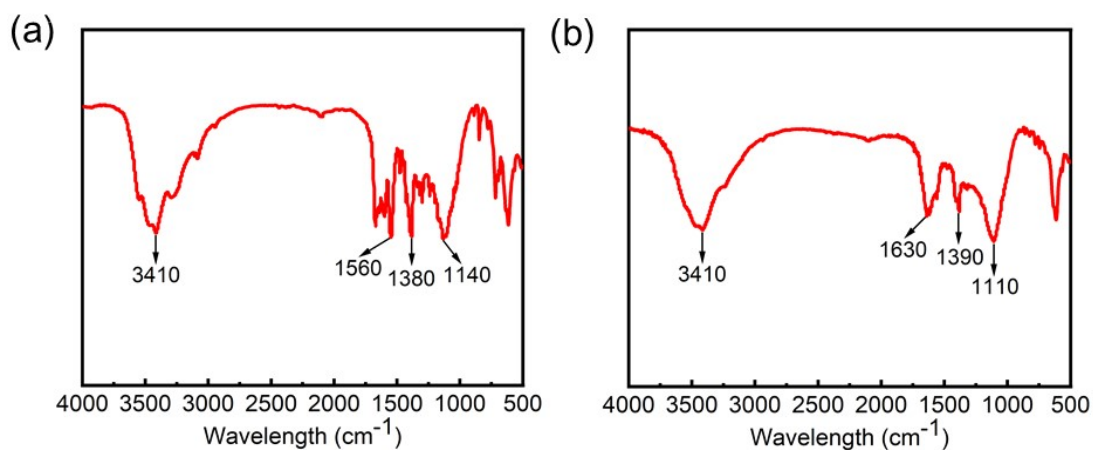

**Fig. S2** IR spectra of Cu-CP-1 (a) and Cu-CP-2 (b).

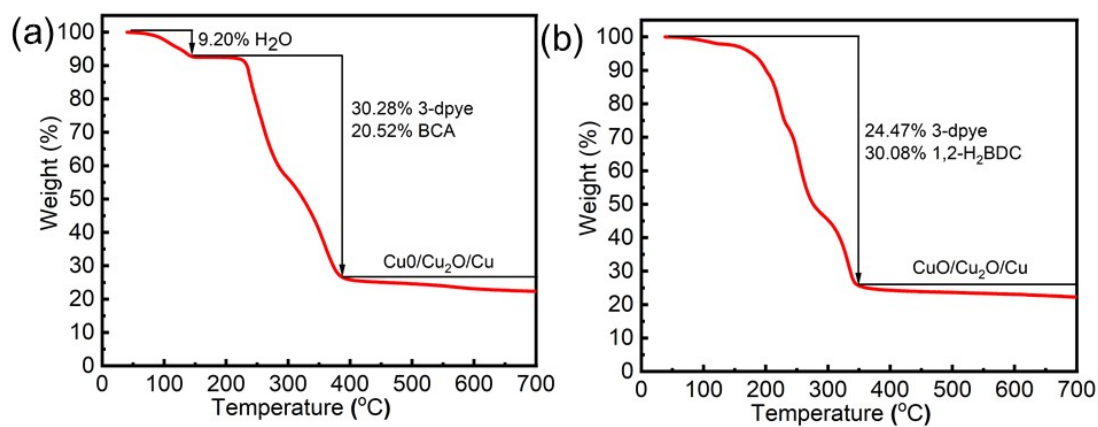

**Fig. S3** TGA curves of Cu-CP-1 (a) and Cu-CP-2 (b).

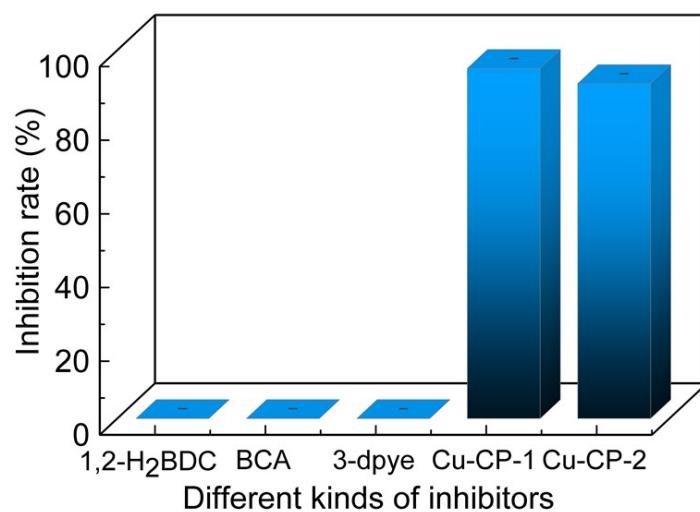

Fig. S4 Different kinds of inhibitors

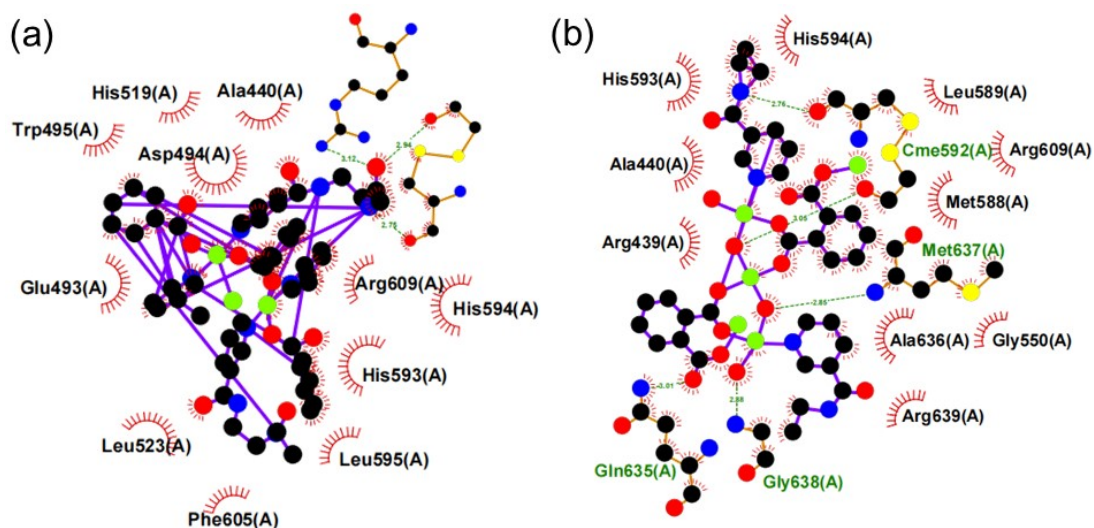

Fig. S5 Binding mode of Cu-CP-1 (a) and Cu-CP-2 (b) with urease in 2D representation. Hydrogen bonds are presented as light dotted lines.

## References

- S1 W. Chen, Y. G. Li, Y. M. Cui, X. Zhang, H. L. Zhu and Q. F. Zeng, *Eur. J. Med. Chem.*, 2010, **45**, 4473–4478.
- S2 Z. L. You, M. Y. Liu, C. F. Wang, G. H. Sheng, X. L. Zhao, D. Qu and F. Niu, *RSC Adv.*, 2016, **6**, 16679–16690.
- S3 W. L. Duan, C. Ma, J. Luan, F. Ding, F. Yan, L. Zhang and W. Z. Li, *Dalton Trans.*, 2023, **52**, 14329–14337.
- S4 Y. X. Li, W. L. Duan, X. T. Zhai, J. Luan and F. Guo, *Inorg. Chim. Acta*, 2022, **543**, 121184.
- S5 X. X. Chen, C. Y. Wang, J. J. Fu, Z. W. Huang, Y. Y. Xu and S. Q. Wang, *Inorg. Chem. Commun.*, 2019, **99**, 70–76.
- S6 X. W. Dong, Y. G. Li, Z. W. Li, Y. M. Cui and H. L. Zhu, *J. Inorg. Biochem.*, 2012, **108**, 22–29.
